# Supplementary material
Source: MDPI journal article supplement (https://www.mdpi.com/2077-0472/13/8/1509)
Supplement: s1 [file s1]

# Supplementary Materials:

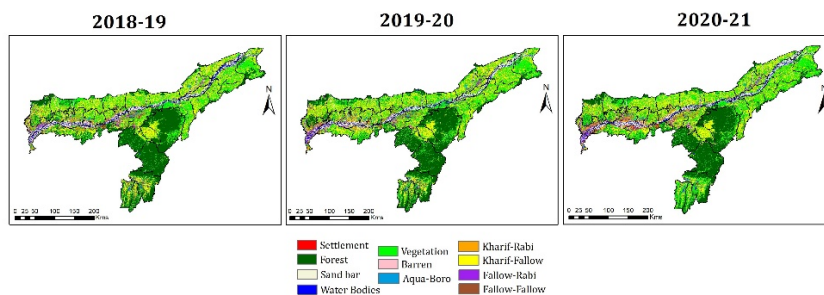

**Figure S1.** Year-wise cropping systems area of Assam (2018-19 to 2020-21).

**Table S1.** Results of accuracy assessment for cropping system maps for three years using error matrix method.

| Outputs generated | Year    | User's accuracy (%) | Producer's accuracy (%) | Overall accuracy (%) | Kappa |
|-------------------|---------|---------------------|-------------------------|----------------------|-------|
| Cropping system   | 2018-19 | 86.1                | 90.1                    | 90.3                 | 0.89  |
|                   | 2019-20 | 89.8                | 93.7                    | 91.2                 | 0.90  |
|                   | 2020-21 | 86.1                | 90.8                    | 89.1                 | 0.88  |
